# Supplementary material for: Coaxial mussel-inspired biofibers: making of a robust and efficacious depot for cancer drug delivery
Source: Royal Society of Chemistry journal article supplement (doi:10.1039/d0tb00052c), 2020-01-01
Supplement: d0tb00052c3.pdf [file d0tb00052c3.pdf]

## Supporting Information

### **Coaxial mussel-inspired biofibers: Making of a robust and efficacious depot for cancer drug delivery**

Sepehr Talebian<sup>+</sup>, In Kyong Shim<sup>+</sup>, Song Cheol Kim<sup>\*</sup>, Geoffrey M. Spinks, Kara L. Vine, Javad Foroughi<sup>\*</sup>

<sup>\*</sup> Correspondence should be addressed to Dr. Javad Foroughi: [Foroughi@uow.edu.au](mailto:Foroughi@uow.edu.au) & , Prof. Song Cheol Kim: [drksc@amc.seoul.kr](mailto:drksc@amc.seoul.kr)

<sup>+</sup> The first two authors contributed equally

#### **Analysis of dye loaded fibers**

Degree of substitution of alginate-dopamine was shown to have a significant effect on the dye release profile and total amount of dye released. Accordingly, fibers made from alginate-dopamine 50% had the slowest release (51  $\mu\text{gr}$ ), followed by the fibers made from alginate-dopamine 25% (32  $\mu\text{gr}$ ) and pure alginate (22  $\mu\text{gr}$ ), respectively (Figure S2, supporting information). Noting, these observations were likely due to strong intramolecular interactions of the dye and the catechol moieties in alginate-dopamine fibers.[1]

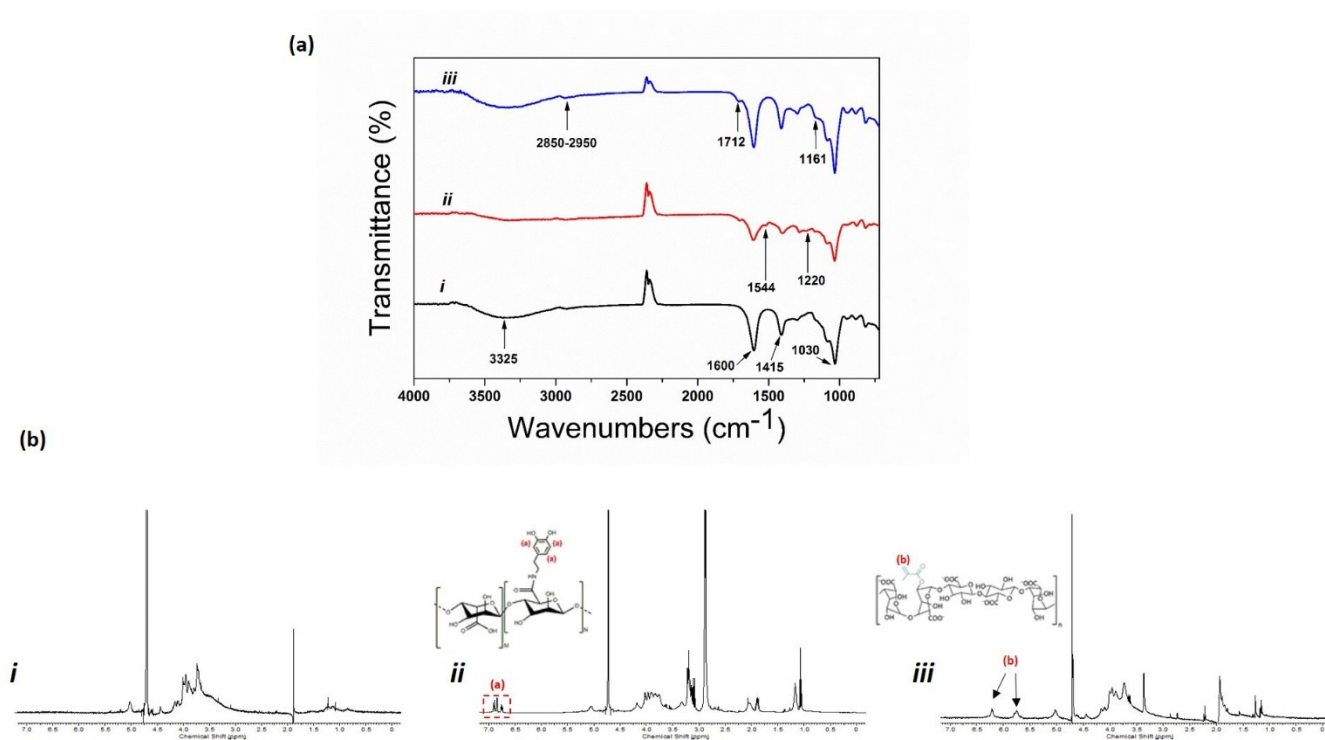

**Figure S1.** Physiochemical characterization of as-synthesized polymers including, (a & b) FTIR and  $^1\text{H}$ NMR spectra of i) pure alginate, ii) alginate-dopamine, and iii) alginate-methacrylate.

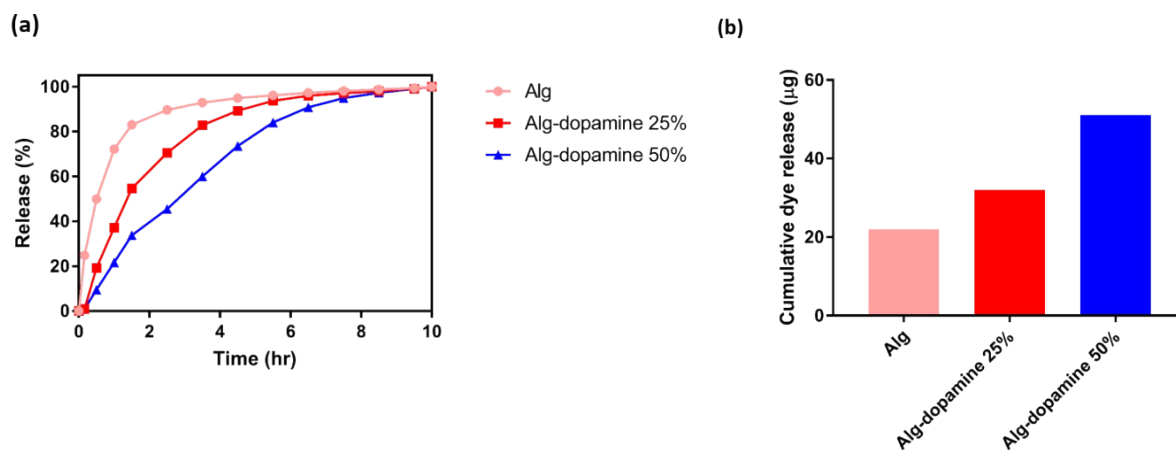

**Figure S2.** Preliminary dye release (fluorescein sodium salt, 2mM) studies from single fibers made from pure alginate (Alg), alginate-dopamine 25% (alg-dopamine 25%), alginate-dopamine 50% (Alg-dopamine 50%) **(a)** Release profile of dye loaded fibers. **(b)** Cumulative dye released from the fibers.

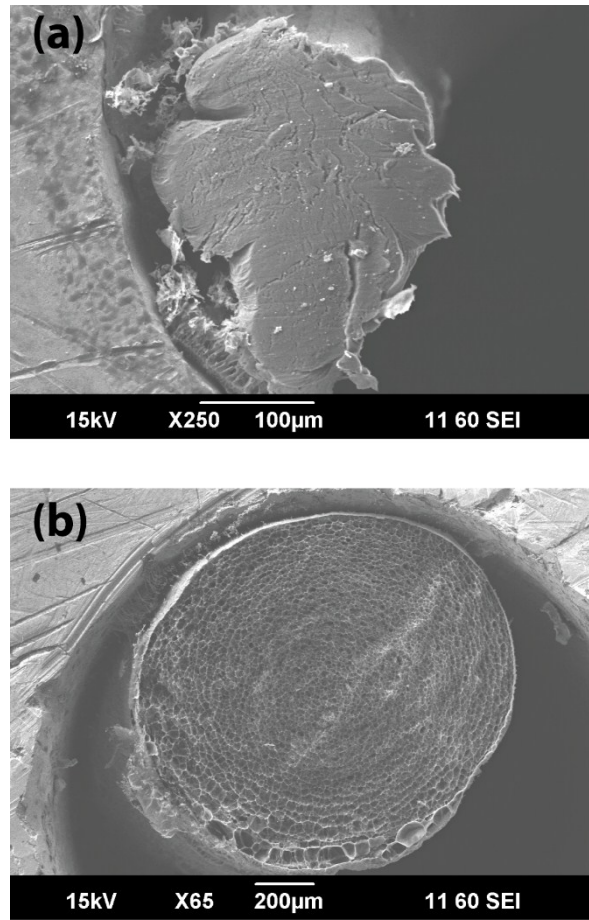

**Figure S3.** Morphology of single fibers made from pure alginate (Alg) using SEM imaging, **(a)** in dry state, **(b)** in complete swollen state after 2 hr of immersion in SBF.

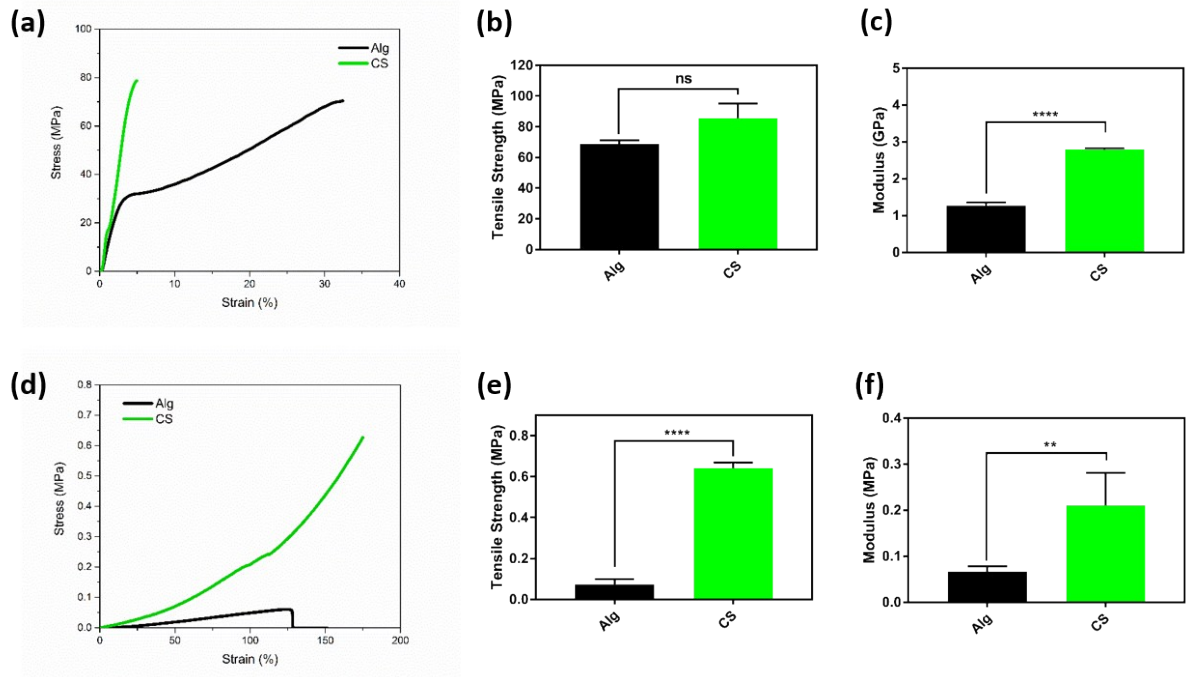

**Figure S4.** Mechanical properties of fibers following a static tensile test, pure alginate fibers (Alg) or core-shell mussel-inspired fibers (CS), **(a)** Stress-strain curve for fibers in dry state. **(b & c)** Tensile strength and modulus of fibers in dry state ( $n = 3$ , mean  $\pm$  SD). **(d)** Stress-strain curve for fibers in wet state. **(e & f)** Tensile strength and modulus of fibers in wet state ( $n = 3$ , mean  $\pm$  SD) (\*\* $P \leq 0.01$ , \*\*\*\* $P = 0.0001$ ).

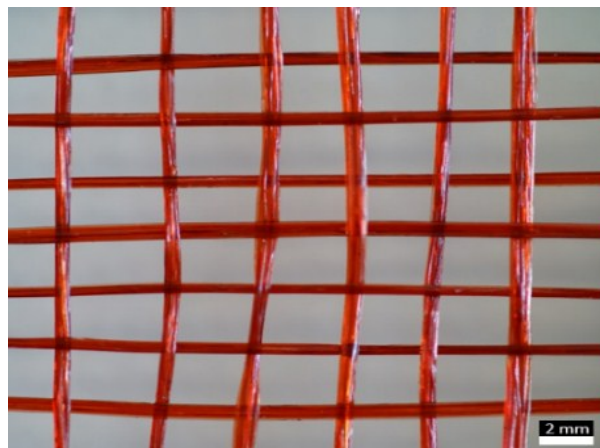

**Figure S5.** Microscopy image of woven DOX-loaded CS fibers (scale bar 2 mm).

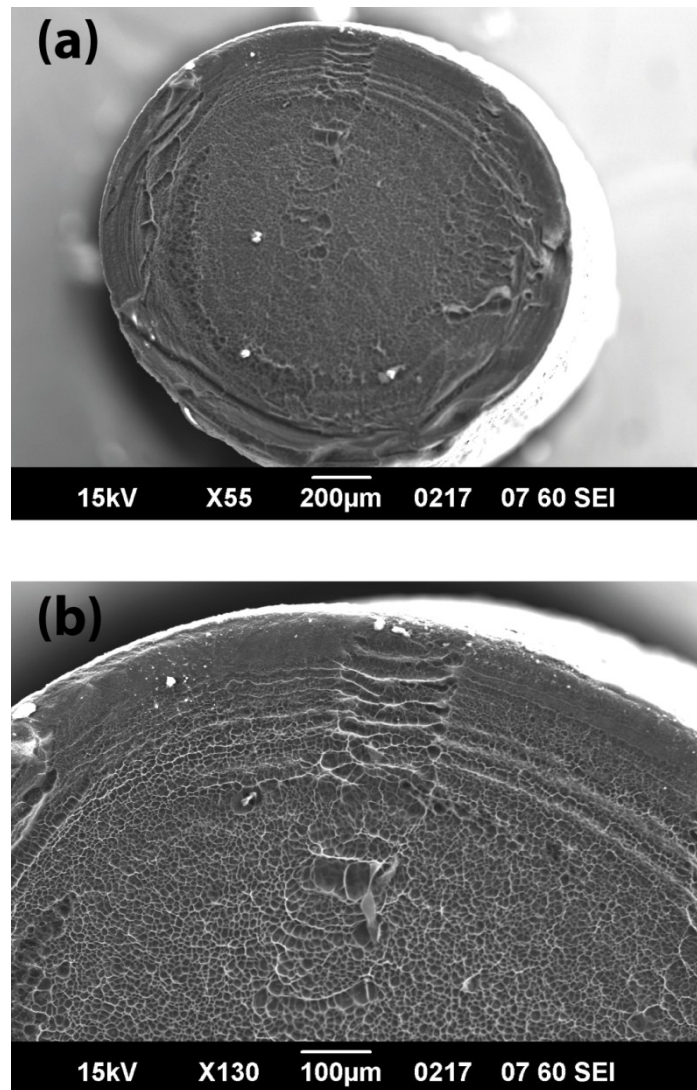

**Figure S6.** Morphology of wet CS\* fibers where both core and shell were made from UV-crosslinkable alginate-methacrylate (3% w/v).

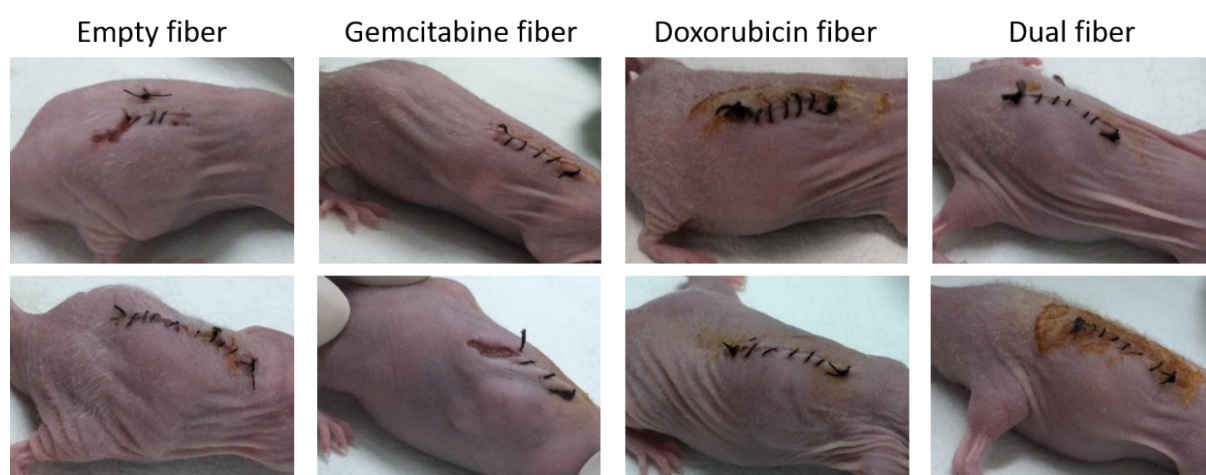

**Figure S7.** Images of tumor bearing mice (MIA PaCa-2) 2 days after implantation of fibers.



(a)

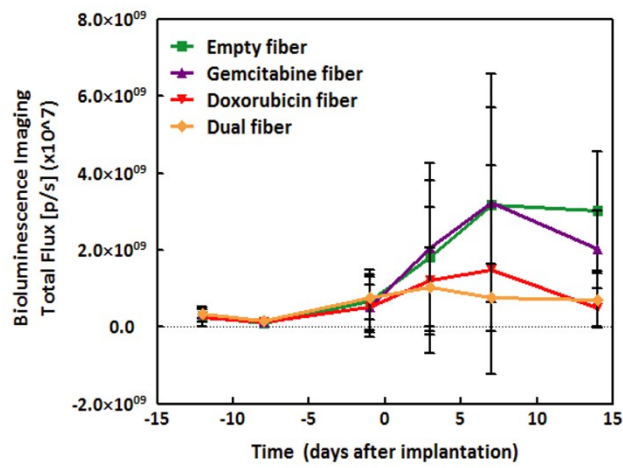

(b)

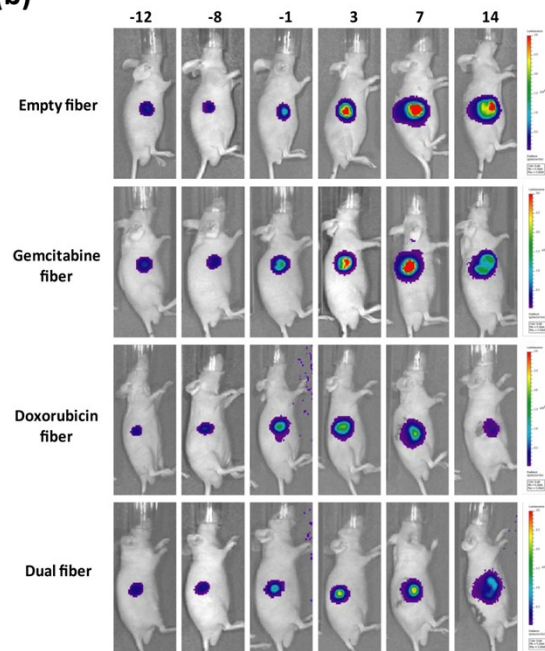

**Figure S8.** Therapeutic effect of drug loaded CS fibers in subcutaneous BxPC3-Luc tumor model. **(a)** Quantitative imaging data of BxCP3-Luc tumor growth presented as mean  $\pm$  SD. **(b)** In vivo luciferase images of growing subcutaneous pancreatic tumors (IVIS Spectrum).

**Table S1.** Hydrodynamic diameter, poly-dispersity index (PDI), and zeta potential of various formulations (n = 5, mean  $\pm$  SD).

| Formulation               | Hydrodynamic diameter (nm) | PDI               | Zeta potential (mV) |
|---------------------------|----------------------------|-------------------|---------------------|
| Alginate                  | 110.9 $\pm$ 0.24           | 0.235 $\pm$ 0.007 | -28.8 $\pm$ 0.36    |
| Alginate+DOX              | 140.1 $\pm$ 0.49           | 0.196 $\pm$ 0.003 | -30.4 $\pm$ 0.94    |
| Alginate+GEM              | 126.2 $\pm$ 1.53           | 0.185 $\pm$ 0.015 | -30.5 $\pm$ 0.30    |
| Alginate-methacrylate     | 205.7 $\pm$ 0.40           | 0.348 $\pm$ 0.017 | -29.9 $\pm$ 0.78    |
| Alginate-methacrylate+DOX | 239.0 $\pm$ 0.73           | 0.440 $\pm$ 0.024 | -30.9 $\pm$ 0.67    |
| Alginate-methacrylate+GEM | 220.2 $\pm$ 0.55           | 0.389 $\pm$ 0.014 | -30.4 $\pm$ 0.68    |
| Alginate-dopamine         | 192.8 $\pm$ 1.83           | 0.352 $\pm$ 0.006 | -33.2 $\pm$ 0.86    |
| Alginate-dopamine+DOX     | 422.0 $\pm$ 0.24           | 0.383 $\pm$ 0.036 | -37.2 $\pm$ 0.69    |
| Alginate-dopamine+GEM     | 388.0 $\pm$ 0.35           | 0.465 $\pm$ 0.006 | -34.0 $\pm$ 0.69    |

**Table S2.** Hematologic parameters from MIA PaCa-2 tumor bearing mice in various treatment groups. Data are presented as average  $\pm$  SD (n = 5). WBC: white blood cell, RBC: red blood cell, HGB: hemoglobin, HCT: hematocrit, PLT: platelet, Neut: neutrophils, Lymph: lymphocytes, Mono: monocytes, Luc: large unstained cells.

| Hematology | Unit    | No treatment          | Doxorubicin bolus      |                        | Gemcitabine bolus     |                         | Dual bolus             |                         | Empty fiber            |                         | Doxorubicin fiber       |                         | Gemcitabine fiber      |                         | Dual fiber            |                        |
|------------|---------|-----------------------|------------------------|------------------------|-----------------------|-------------------------|------------------------|-------------------------|------------------------|-------------------------|-------------------------|-------------------------|------------------------|-------------------------|-----------------------|------------------------|
|            |         |                       | Day 3                  | Day14                  | Day 3                 | Day14                   | Day 3                  | Day14                   | Day 3                  | Day14                   | Day 3                   | Day14                   | Day 3                  | Day14                   | Day 3                 | Day14                  |
| WBC        | 10e3/uL | 3.97 $\pm$ 0.53       | 5.87 $\pm$ 0.86        | 6.85 $\pm$ 0.46        | 3.20 $\pm$ 0.37       | 5.84 $\pm$ 0.73         | 3.06 $\pm$ 0.77        | 6.98 $\pm$ 1.52         | 3.75 $\pm$ 0.91        | 4.52 $\pm$ 0.65         | 4.57 $\pm$ 1.11         | 5.24 $\pm$ 1.27         | 3.41 $\pm$ 1.29        | 5.02 $\pm$ 0.50         | 4.79 $\pm$ 1.17       | 4.02 $\pm$ 0.51        |
| RBC        | 10e6/uL | 10.08 $\pm$ 0.07      | 9.93 $\pm$ 0.23        | 9.81 $\pm$ 0.26        | 9.98 $\pm$ 0.27       | 9.99 $\pm$ 0.35         | 10.20 $\pm$ 0.32       | 10.40 $\pm$ 0.29        | 10.07 $\pm$ 0.21       | 10.20 $\pm$ 0.26        | 10.46 $\pm$ 0.33        | 5.42 $\pm$ 0.75         | 9.88 $\pm$ 0.32        | 9.29 $\pm$ 1.27         | 9.66 $\pm$ 0.34       | 10.07 $\pm$ 0.24       |
| HGB        | g/dL    | 15.00 $\pm$ 0.43      | 14.95 $\pm$ 0.10       | 15.20 $\pm$ 0.33       | 14.86 $\pm$ 0.34      | 15.26 $\pm$ 0.27        | 15.16 $\pm$ 0.27       | 15.64 $\pm$ 0.26        | 14.88 $\pm$ 0.56       | 15.10 $\pm$ 0.52        | 15.43 $\pm$ 0.50        | 13.8 $\pm$ 1.16         | 15.23 $\pm$ 0.23       | 14.05 $\pm$ 1.84        | 14.80 $\pm$ 0.27      | 14.80 $\pm$ 0.44       |
| HCT        | %       | 50.13 $\pm$ 0.70      | 49.78 $\pm$ 1.36       | 49.38 $\pm$ 1.46       | 48.26 $\pm$ 1.40      | 50.48 $\pm$ 1.30        | 48.18 $\pm$ 1.20       | 51.94 $\pm$ 0.78        | 48.20 $\pm$ 1.76       | 51.33 $\pm$ 1.44        | 50.00 $\pm$ 1.75        | 47.2 $\pm$ 3.89         | 49 $\pm$ 0.72          | 50.00 $\pm$ 1.55        | 47.38 $\pm$ 1.23      | 50.53 $\pm$ 1.96       |
| PLT        | 10e3/uL | 996.75 $\pm$<br>73.51 | 692.25 $\pm$<br>212.99 | 961.80 $\pm$<br>258.09 | 705.00 $\pm$<br>73.71 | 1100.40 $\pm$<br>195.05 | 704.20 $\pm$<br>225.01 | 1215.60 $\pm$<br>185.03 | 1252.5 $\pm$<br>217.40 | 1037.67 $\pm$<br>216.16 | 1417.00 $\pm$<br>211.50 | 1266.25 $\pm$<br>189.59 | 900.33 $\pm$<br>102.96 | 1032.00 $\pm$<br>159.61 | 911.25 $\pm$<br>52.78 | 1239.33 $\pm$<br>68.50 |
| Neut       | 10e3/uL | 1.46 $\pm$ 0.12       | 2.41 $\pm$ 0.29        | 2.39 $\pm$ 0.53        | 0.79 $\pm$ 0.26       | 2.32 $\pm$ 0.30         | 0.59 $\pm$ 0.16        | 2.98 $\pm$ 0.48         | 1.20 $\pm$ 0.41        | 2.34 $\pm$ 0.66         | 3.89 $\pm$ 1.76         | 3.45 $\pm$ 0.93         | 1.29 $\pm$ 0.91        | 2.41 $\pm$ 7.95         | 2.67 $\pm$ 0.82       | 2.54 $\pm$ 0.44        |
| Lymph      | 10e3/uL | 2.30 $\pm$ 0.47       | 2.85 $\pm$ 0.91        | 3.30 $\pm$ 1.02        | 2.04 $\pm$ 0.48       | 2.90 $\pm$ 0.88         | 2.17 $\pm$ 0.80        | 3.36 $\pm$ 1.30         | 2.26 $\pm$ 0.55        | 1.94 $\pm$ 0.07         | 1.85 $\pm$ 0.51         | 1.50 $\pm$ 0.49         | 1.88 $\pm$ 0.27        | 1.85 $\pm$ 0.29         | 1.90 $\pm$ 0.51       | 1.21 $\pm$ 0.11        |
| Mono       | 10e3/uL | 0.07 $\pm$ 0.02       | 0.22 $\pm$ 0.06        | 0.25 $\pm$ 0.04        | 0.08 $\pm$ 0.02       | 0.32 $\pm$ 0.09         | 0.06 $\pm$ 0.01        | 0.40 $\pm$ 0.07         | 0.09 $\pm$ 0.03        | 0.08 $\pm$ 0.04         | 0.03 $\pm$ 0            | 0.12 $\pm$ 0.02         | 0.07 $\pm$ 0.02        | 4.07 $\pm$ 7.95         | 0.03 $\pm$ 0.01       | 0.08 $\pm$ 0.01        |
| Luc        | 10e3/uL | 0.04 $\pm$ 0.01       | 0.03 $\pm$ 0.01        | 0.01 $\pm$ 0.01        | 0.02 $\pm$ 0.01       | 0.02 $\pm$ 0.01         | 0.05 $\pm$ 0.02        | 0.02 $\pm$ 0.01         | 0.13 $\pm$ 0.01        | 0.06 $\pm$ 0.01         | 0.04 $\pm$ 0.02         | 0.06 $\pm$ 0.02         | 0.12 $\pm$ 0.08        | 0.04 $\pm$ 0.02         | 0.14 $\pm$ 0.04       | 0.05 $\pm$ 0.01        |

**Video S1.** Video showing the fabrication process of drug loaded coaxial hydrogel fibers through wet-spinning process.

**Video S2.** Movie showing the swelling of drug loaded coaxial hydrogel fibers in SBF

## References

[1] C. Lee, J. Shin, J.S. Lee, E. Byun, J.H. Ryu, S.H. Um, D.-I. Kim, H. Lee, S.-W. Cho, Bioinspired, calcium-free alginate hydrogels with tunable physical and mechanical properties and improved biocompatibility, *Biomacromolecules* 14(6) (2013) 2004-2013.
